# Supplementary material for: Insights from Integrative Systematics Reveal Cryptic Diversity in Pristimantis Frogs (Anura: Craugastoridae) from the Upper Amazon Basin
Source: PubMed Central journal article supplement (PMC4658055; doi:10.1371/journal.pone.0143392), 2015-11-24

a)

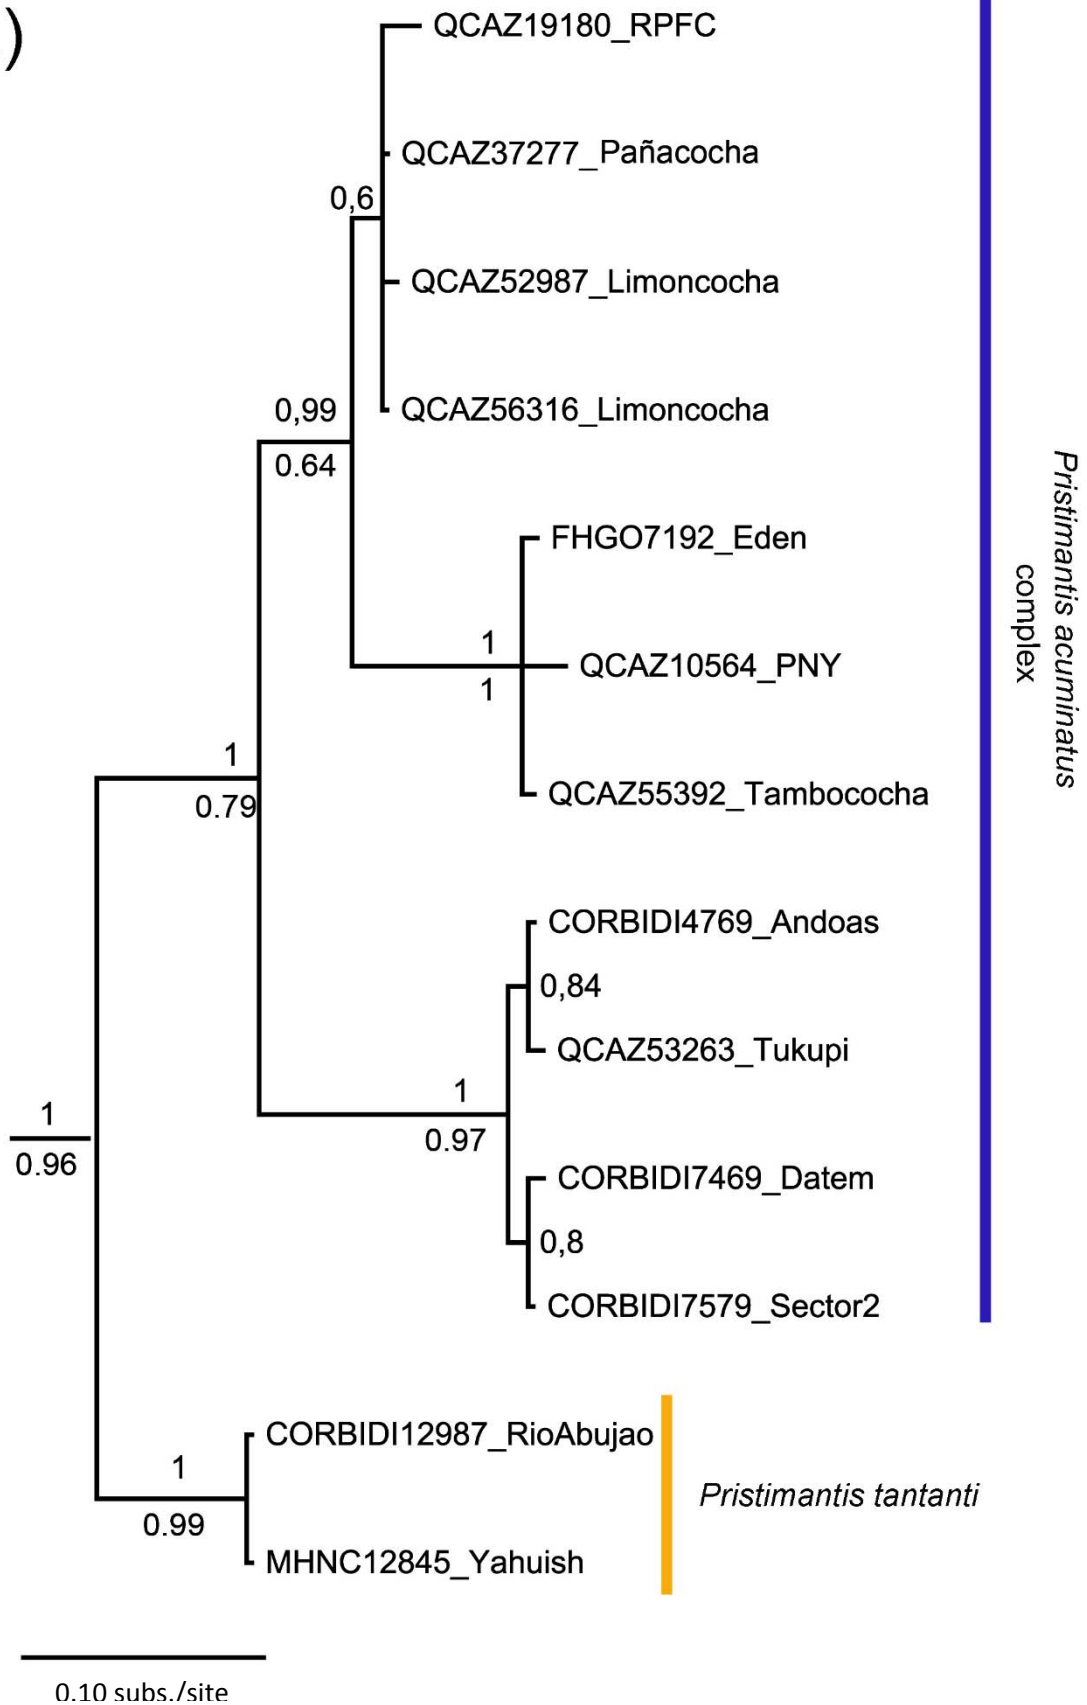

b)

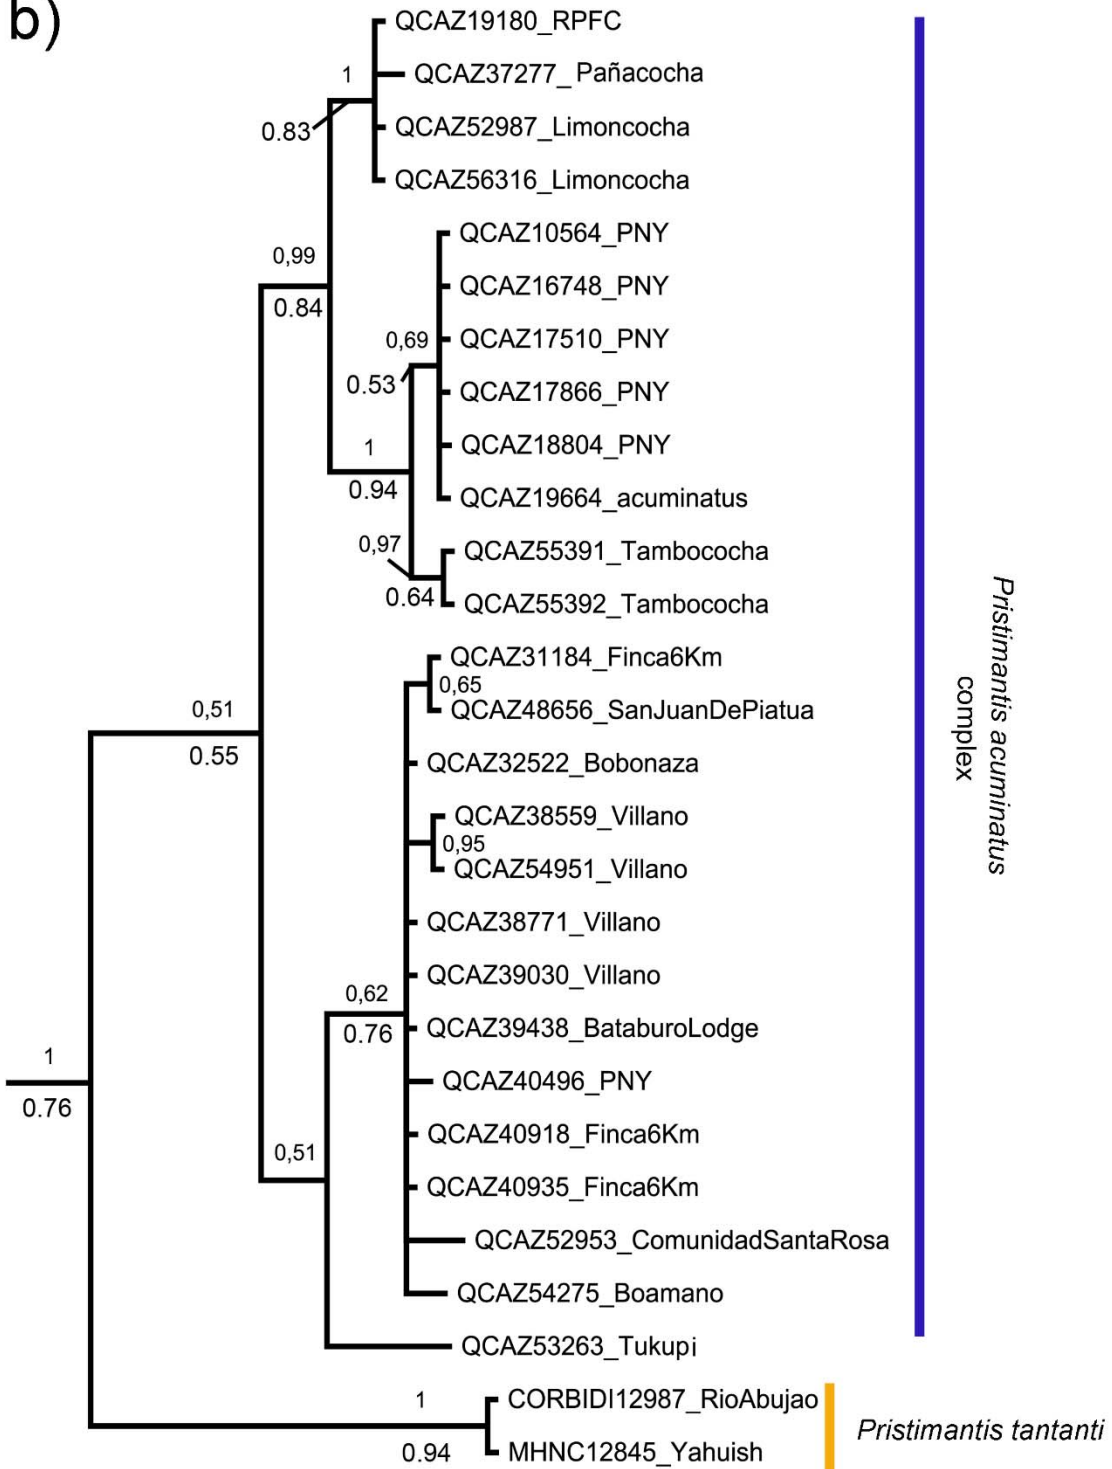

0.10 subs./site



d)

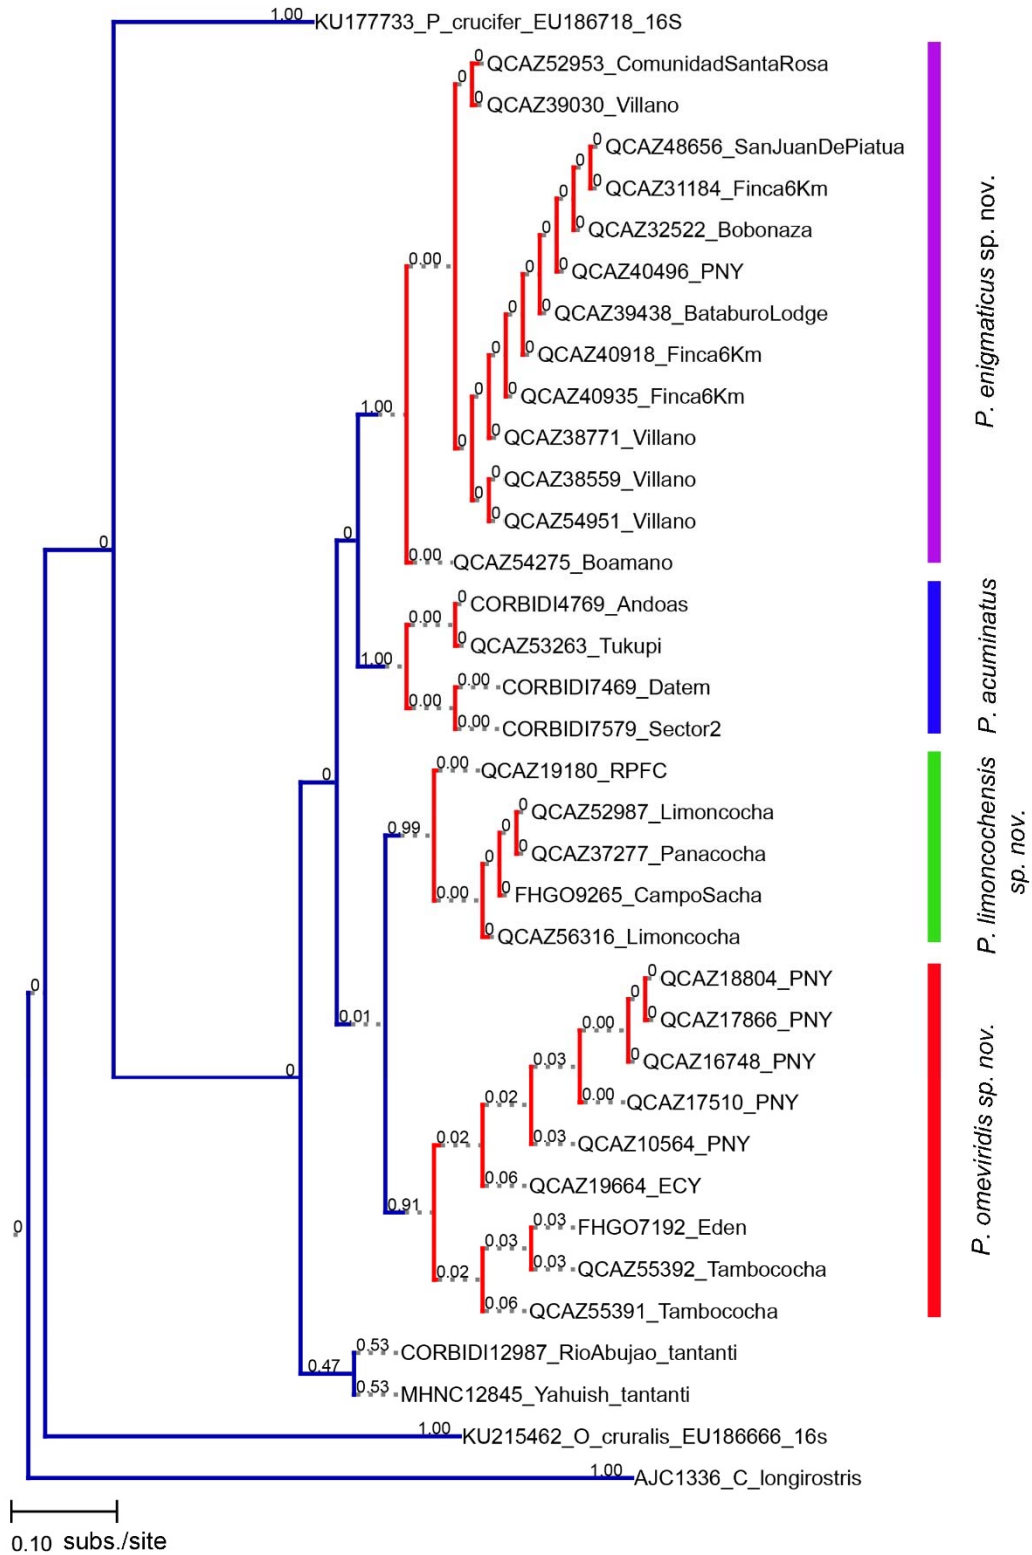

Supplement: pone.0143392.s001.pdf [file pone.0143392.s001.pdf]
